# Supplementary material
Source: publisher figshare collection journal article supplement (https://acs.figshare.com/ndownloader/files/32090375)
Supplement: Supplementary file 1 [file 32090375]

## *Supporting Information*

### *Tuning effect of the zeolite Brønsted acidity on the FeZn bimetallic hydrodesulfurization catalyst*

*Wenkai Wei,<sup>†</sup> Xinyue Zhang,<sup>†</sup> Xuandong Liu,<sup>†</sup> Rong Guo,<sup>†</sup> Bo Meng<sup>†</sup>, Guosheng Li<sup>†</sup>, Shenyong Ren<sup>†</sup>, Qiaoxia Guo,<sup>§</sup> Baojian Shen<sup>\*,†</sup>*

<sup>†</sup>State Key Laboratory of Heavy Oil Processing; the Key Laboratory of Catalysis of CNPC;

College of Chemical Engineering and Environment, China University of Petroleum, No. 18

Fuxue Road, Changping, Beijing 102249, China

<sup>§</sup>College of Sciences, China University of Petroleum, No. 18 Fuxue Road, Changping, Beijing  
102249, China

\*Corresponding Author: Baojian Shen

TEL: +(8610)89733369

FAX: +(8610)89733369

EMAIL: baojian@cup.edu.cn

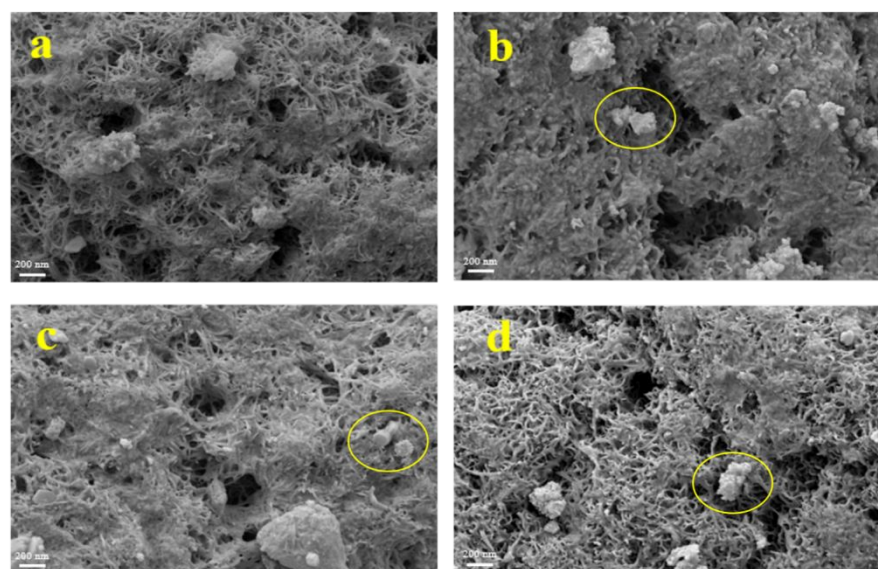

**Figure S1.** SEM images of (a) PA, (b) PSA10, (c) PSA18 and (d) PSA24 supports.

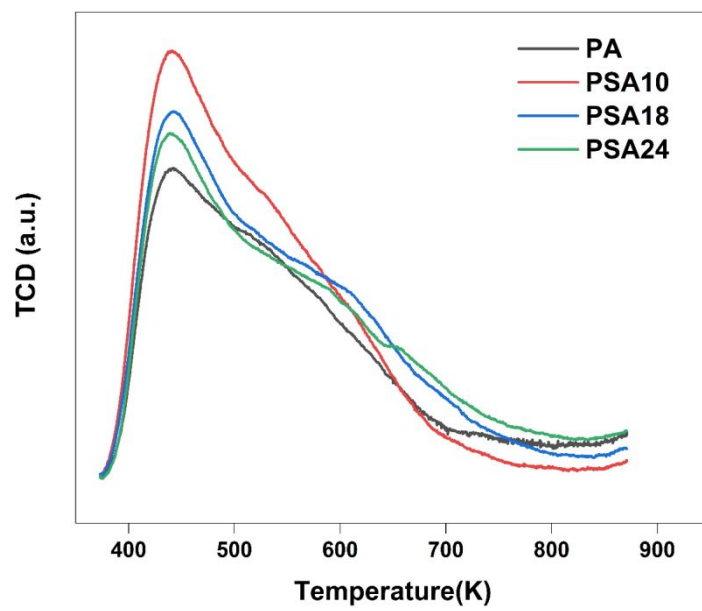

**Figure S2.**  $\text{NH}_3$ -TPD profiles of supports.

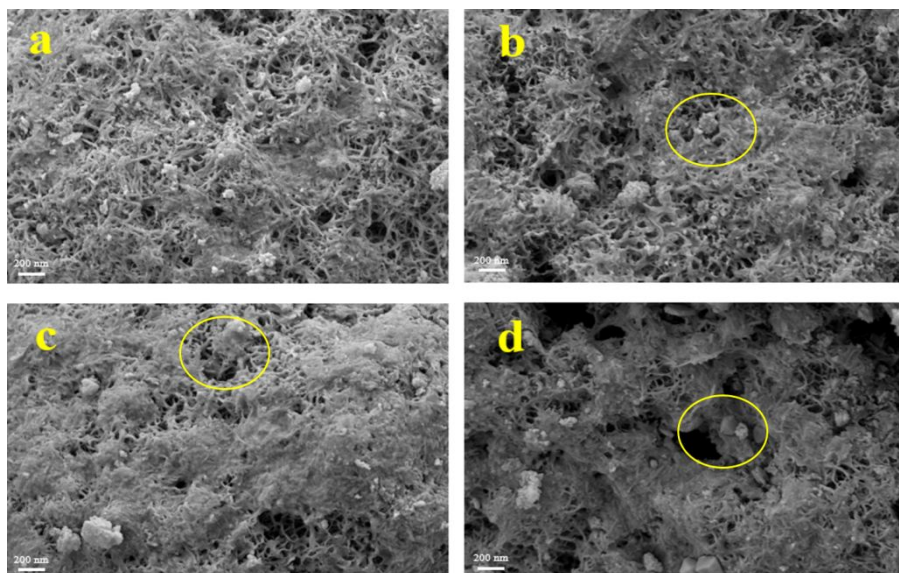

**Figure S3.** SEM images of (a) FZ-PA, (b) FZ-PSA10, (c) FZ-PSA18 and (d) FZ-PSA24 oxide catalysts.

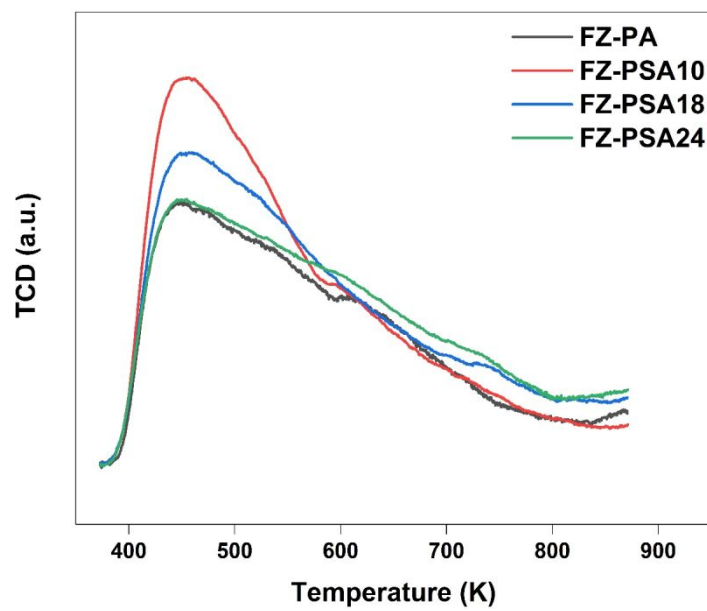

**Figure S4.**  $\text{NH}_3$ -TPD profiles of catalysts in oxide form.

**Table S1.** Detailed texture properties of supported FeZn catalysts before  $\text{H}_2$ -reduction

| Supports | $S_{\text{BET}}$<br>$/(\text{m}^2 \cdot \text{g}^{-1})$ | $S_{\text{Micro}}$<br>$/(\text{m}^2 \cdot \text{g}^{-1})$ | $S_{\text{EXT}}$<br>$/(\text{m}^2 \cdot \text{g}^{-1})$ | $V_{\text{P}}$<br>$/(\text{cm}^3 \cdot \text{g}^{-1})$ | $V_{\text{micro}}$<br>$/(\text{cm}^3 \cdot \text{g}^{-1})$ | $V_{\text{meso}}$<br>$/(\text{cm}^3 \cdot \text{g}^{-1})$ | $D_{\text{aver}}$<br>$/\text{nm}$ |
|----------|---------------------------------------------------------|-----------------------------------------------------------|---------------------------------------------------------|--------------------------------------------------------|------------------------------------------------------------|-----------------------------------------------------------|-----------------------------------|
| FZ-PA    | 251                                                     | 26                                                        | 225                                                     | 0.785                                                  | 0.011                                                      | 0.774                                                     | 12.52                             |
| FZ-PSA10 | 313                                                     | 136                                                       | 177                                                     | 0.649                                                  | 0.066                                                      | 0.583                                                     | 8.31                              |
| FZ-PSA18 | 301                                                     | 133                                                       | 168                                                     | 0.630                                                  | 0.064                                                      | 0.566                                                     | 8.38                              |

|          |     |     |     |       |       |       |      |
|----------|-----|-----|-----|-------|-------|-------|------|
| FZ-PSA24 | 302 | 126 | 176 | 0.617 | 0.060 | 0.557 | 8.17 |
|----------|-----|-----|-----|-------|-------|-------|------|

**Table S2.** Composition of supported FeZn catalysts before H<sub>2</sub>-reduction

| Catalysts | Composition of the<br>catalysts(wt%, XRF) |      |         | Composition of the<br>catalysts(wt%, ICP) |      |         |
|-----------|-------------------------------------------|------|---------|-------------------------------------------|------|---------|
|           | Fe <sub>2</sub> O <sub>3</sub>            | ZnO  | Support | Fe <sub>2</sub> O <sub>3</sub>            | ZnO  | Support |
| FZ-PA     | 9.0                                       | 12.7 | 78.3    | 9.4                                       | 13.0 | 77.6    |
| FZ-PSA10  | 9.1                                       | 13.1 | 77.8    | 9.6                                       | 13.5 | 76.9    |
| FZ-PSA18  | 9.1                                       | 12.8 | 78.1    | 9.3                                       | 13.3 | 77.4    |
| FZ-PSA24  | 9.0                                       | 13.0 | 78.0    | 9.5                                       | 13.4 | 77.1    |

The Py-IR characterization of the fresh and spend catalyst was performed and the spectra were presented in **Figure S5**. It is apparent that the characteristic peak around 1543 cm<sup>-1</sup> belongs to the Brønsted acid sites and the peak at 1453 cm<sup>-1</sup> is attributed to the Lewis acid sites. It is obvious that the peak intensity of the spend catalyst FZ-PSA18 is weaker than that of the fresh catalyst FZ-

PSA18. The densities of Brønsted and Lewis acid sites in catalyst can be calculated in **Table S3**.

After reaction, the total amount of B acid and L acid dropped from 20 to 8  $\mu\text{mol/g}$ , 149 to 74  $\mu\text{mol/g}$ , respectively. This is due to the formation of coke on the catalyst. The SEM-EDS spectra of fresh catalyst FZ-PSA18 and spend catalyst FZ-PSA18 catalysts were presented in **Figure S6**.

Compared with fresh catalyst FZ-PSA18, the carbon content in the spend catalyst FZ-PSA18 catalyst increased significantly from 5.4 to 31.8 wt%, which is consistent with the Py-IR result.

These results indicate that under the experimental conditions of this article, the introduction of Y-type zeolite will cause the obvious coke deposition of the catalyst.

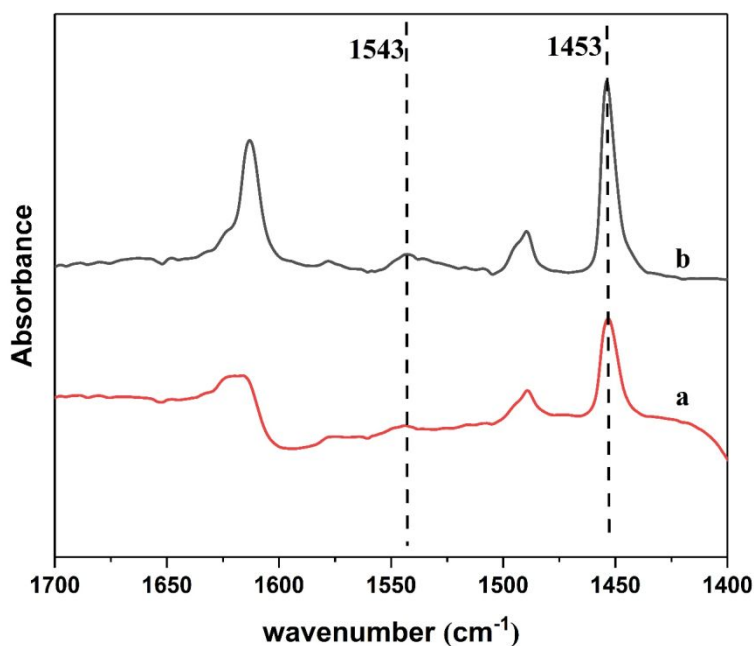

**Figure S5.** Py-IR spectra of (a) spend catalyst FZ-PSA18, (b) fresh catalyst FZ-PSA18

**Table S3.** B acid, L acid and Total acid of fresh catalyst FZ-PSA18 and spend catalyst FZ-PSA18

| Catalysts               | Total acid sites ( $\mu\text{mol/g}$ ) |     |       | Medium and strong acid sites ( $\mu\text{mol/g}$ ) |    |       |
|-------------------------|----------------------------------------|-----|-------|----------------------------------------------------|----|-------|
|                         | B                                      | L   | Total | B                                                  | L  | Total |
| fresh catalyst FZ-PSA18 | 20                                     | 149 | 169   | 14                                                 | 72 | 86    |
| spend catalyst FZ-PSA18 | 8                                      | 74  | 82    | 4                                                  | 49 | 53    |

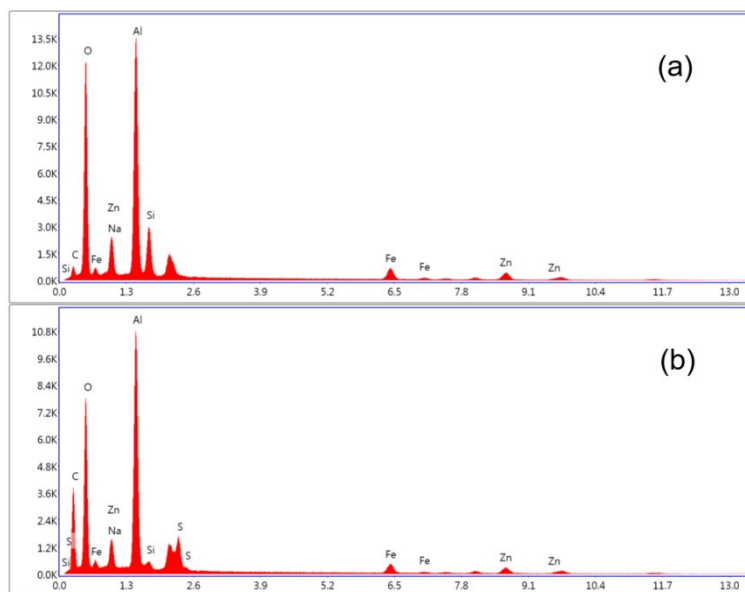

**Figure S6.** SEM-EDS spectra of catalysts. (a) fresh catalyst FZ-PSA18, (b) spend catalyst FZ-PSA18
